# Supplementary material for: One-pot three-component tandem annulation of 4-hydroxycoumarine with aldehyde and aromatic amines using graphene oxide as an efficient catalyst
Source: PubMed Central journal article supplement (PMC8494800; doi:10.1038/s41598-021-99360-3), 2021-10-06
Supplement: 41598_2021_99360_MOESM1_ESM.pdf [file 41598_2021_99360_MOESM1_ESM.pdf]

## Supplementary Material

### One-pot three-component tandem annulation of 4-hydroxycoumarin with aldehyde and aromatic amines using Graphene oxide as an efficient catalyst

Rabindranath Singha, Aminul Islam and Pranab Ghosh\*

Department of Chemistry, University of North Bengal, Dist-Darjeeling, West Bengal, India.

Tel.: +91 (0353) 2776381; fax: +91 (0353) 2699001

E-mail address: [pizyl2@yahoo.com](mailto:pizyl2@yahoo.com) (P. Ghosh)

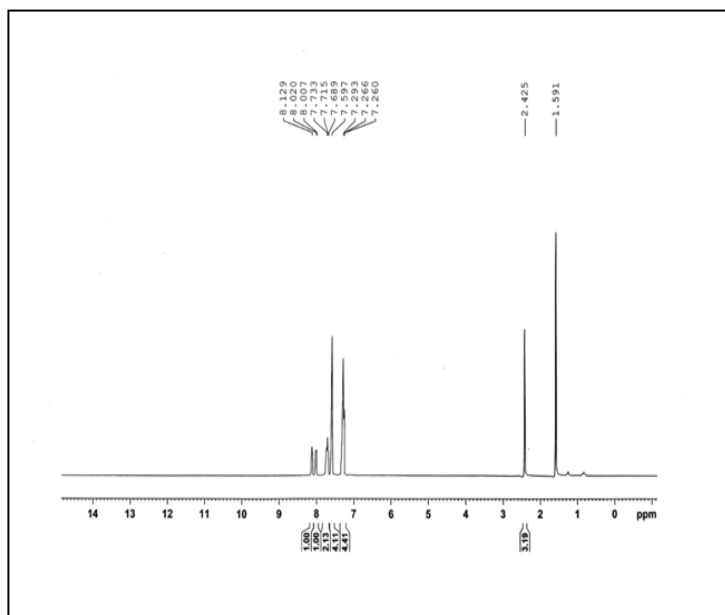

Fig 1. <sup>1</sup>H NMR spectrum of Compound 4a

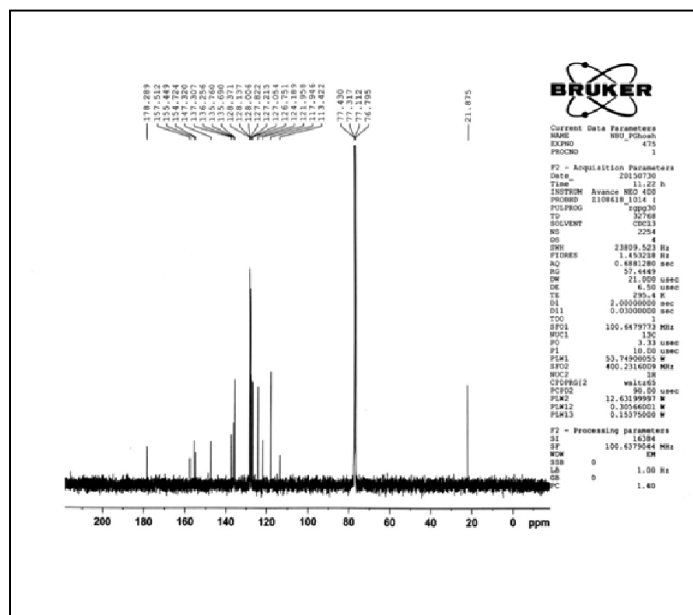

Fig 2. <sup>13</sup>C NMR spectrum of compound 4a

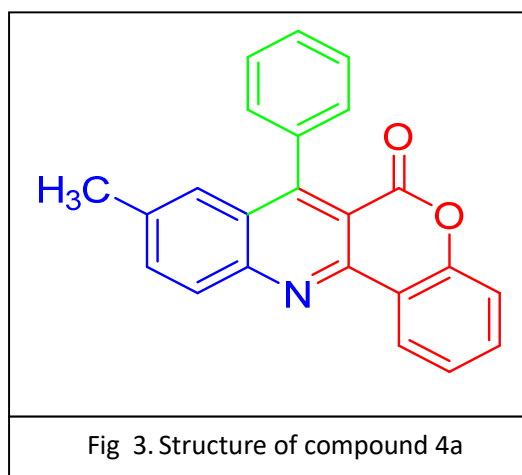

Fig 3. Structure of compound 4a





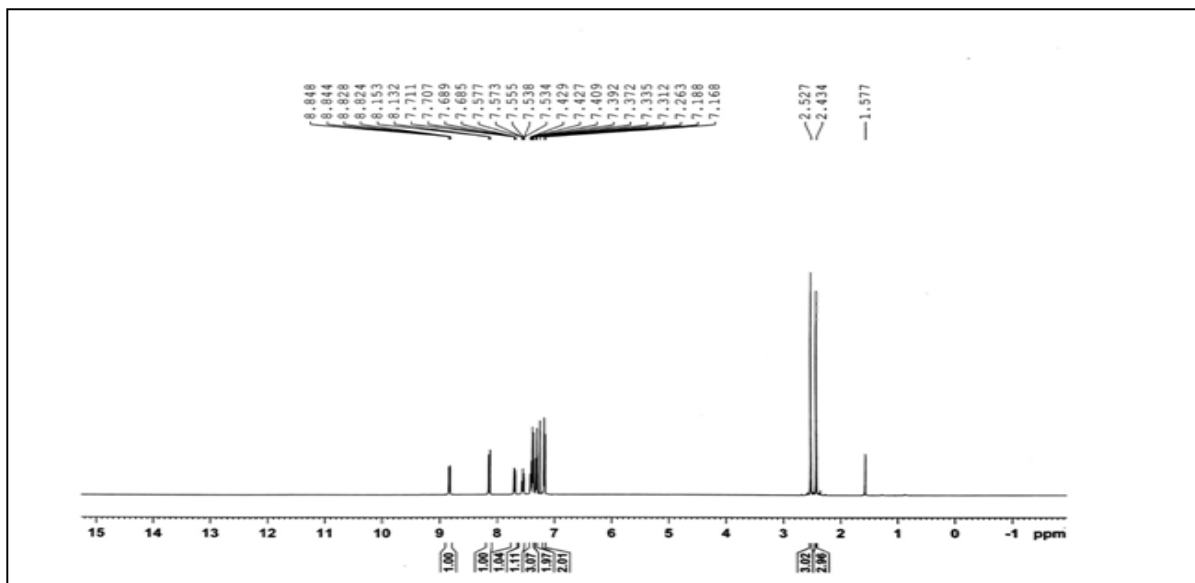

Fig 10. <sup>1</sup>H NMR spectrum of Compound 4d

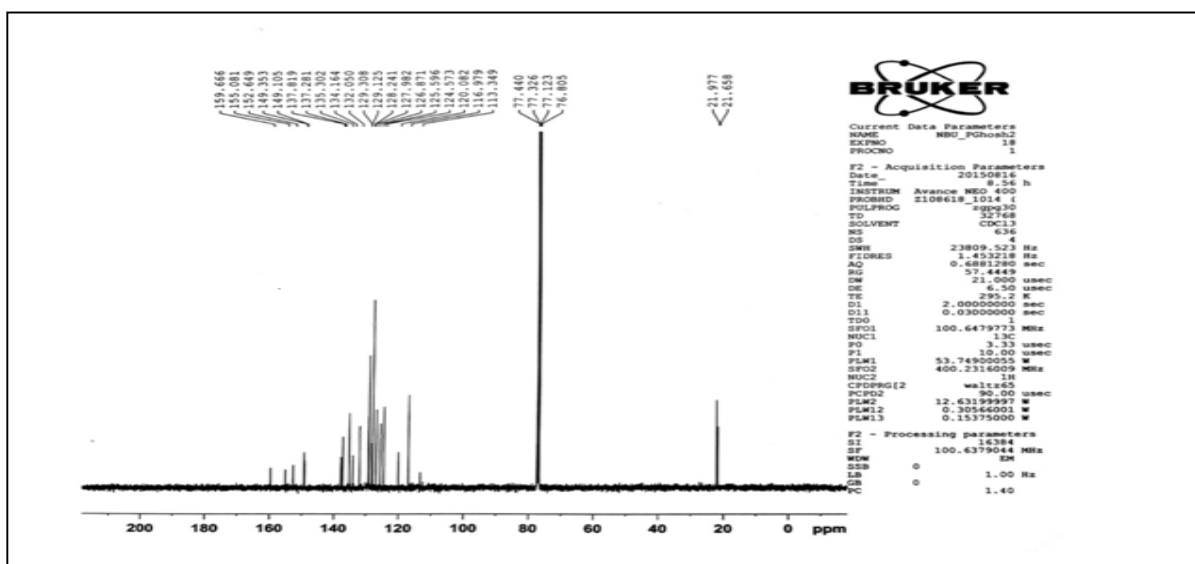

Fig 11. <sup>13</sup>C NMR spectrum of compound 4d

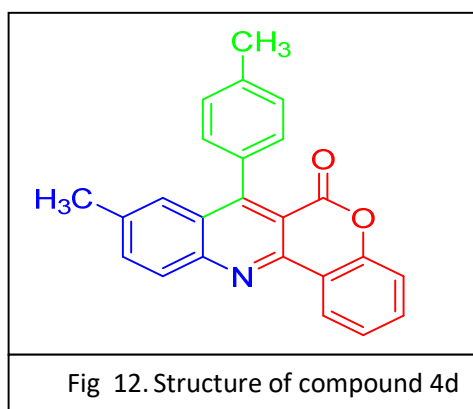

Fig 12. Structure of compound 4d



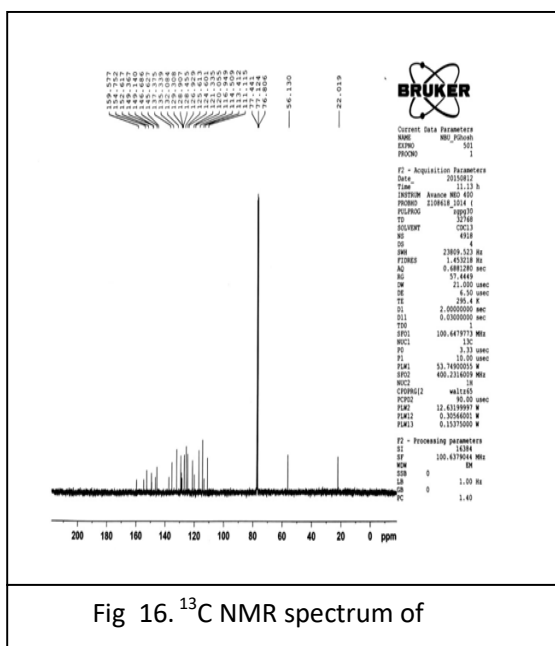

Fig 16. <sup>13</sup>C NMR spectrum of

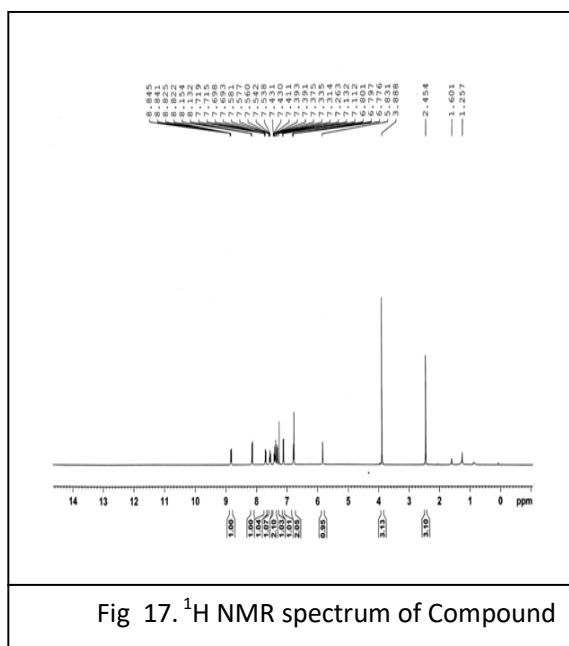

Fig 17. <sup>1</sup>H NMR spectrum of Compound

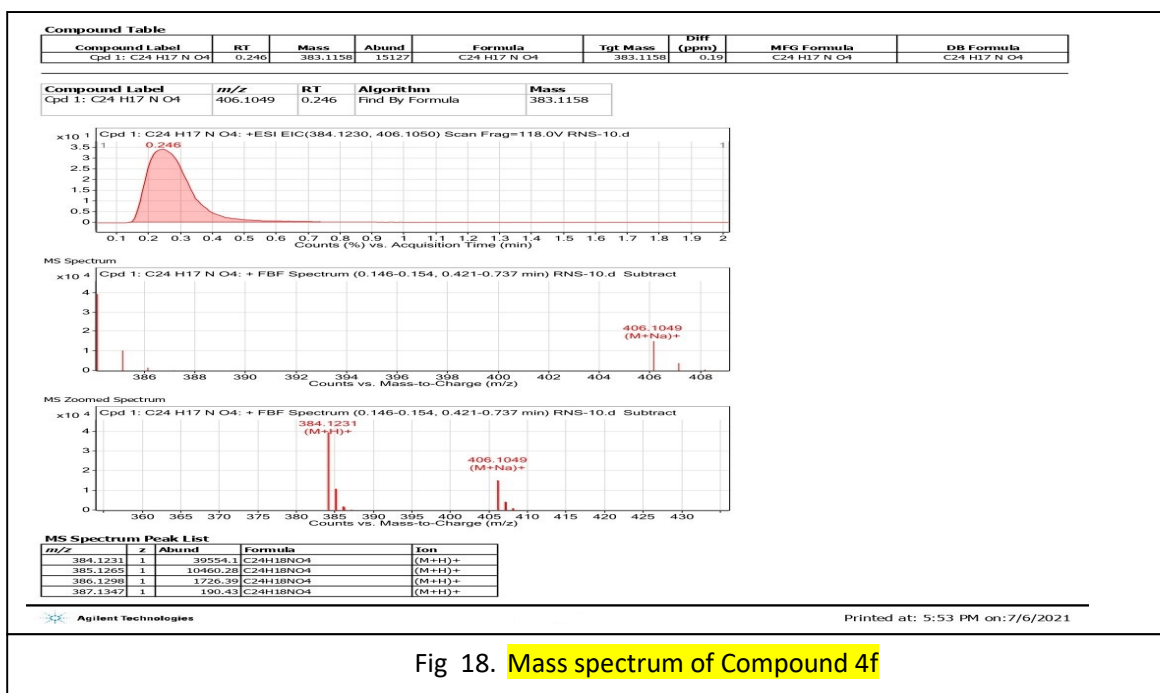

Fig 18. Mass spectrum of Compound 4f

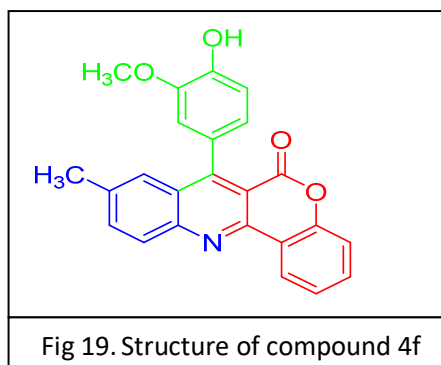

Fig 19. Structure of compound 4f

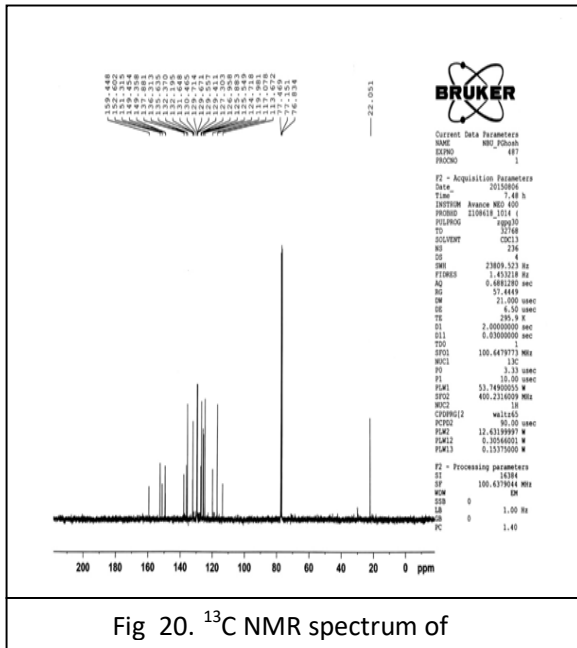

Fig 20. <sup>13</sup>C NMR spectrum of

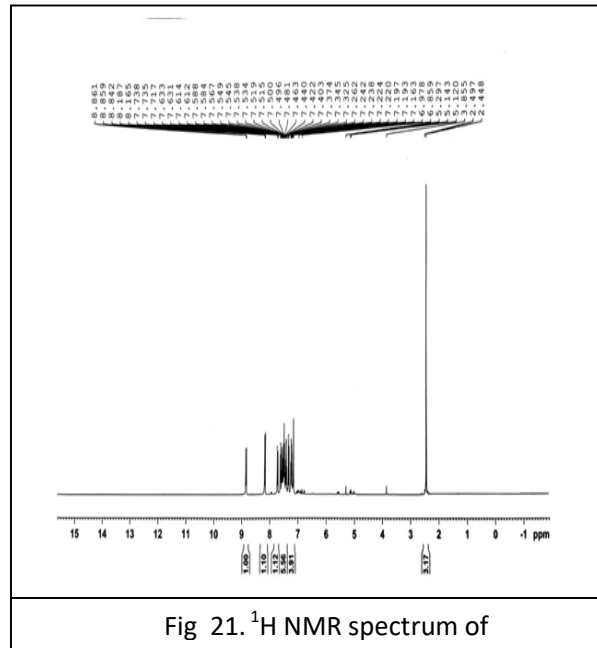

Fig 21. <sup>1</sup>H NMR spectrum of

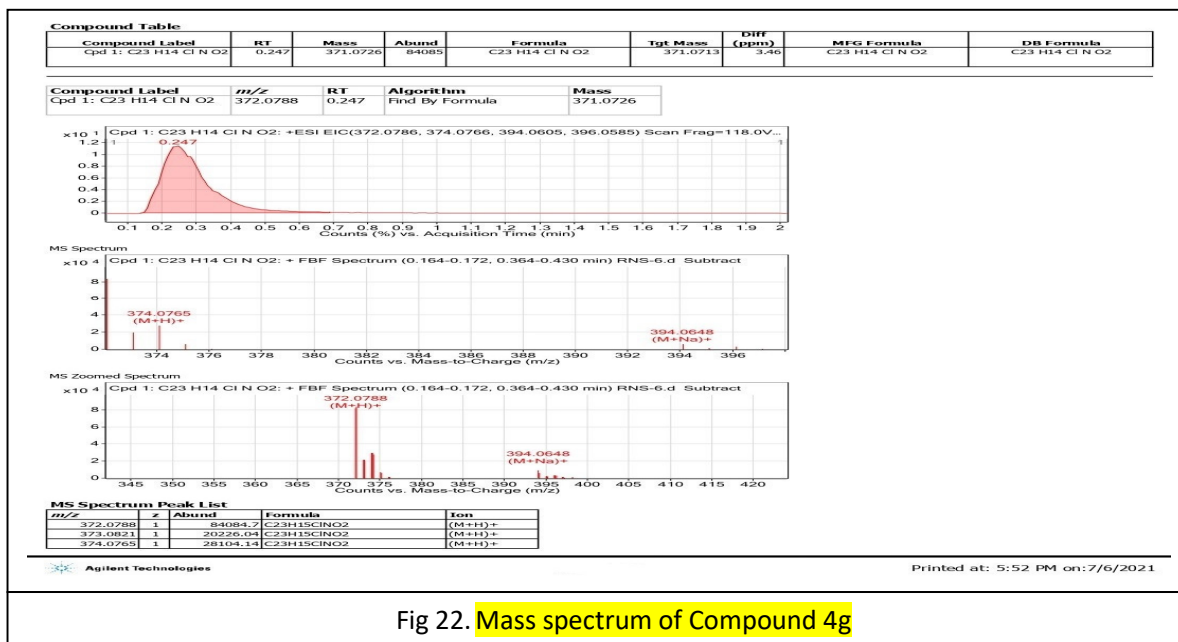

Fig 22. Mass spectrum of Compound 4g

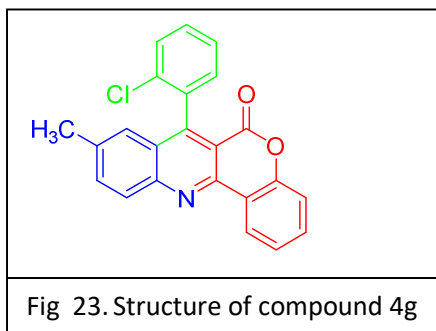

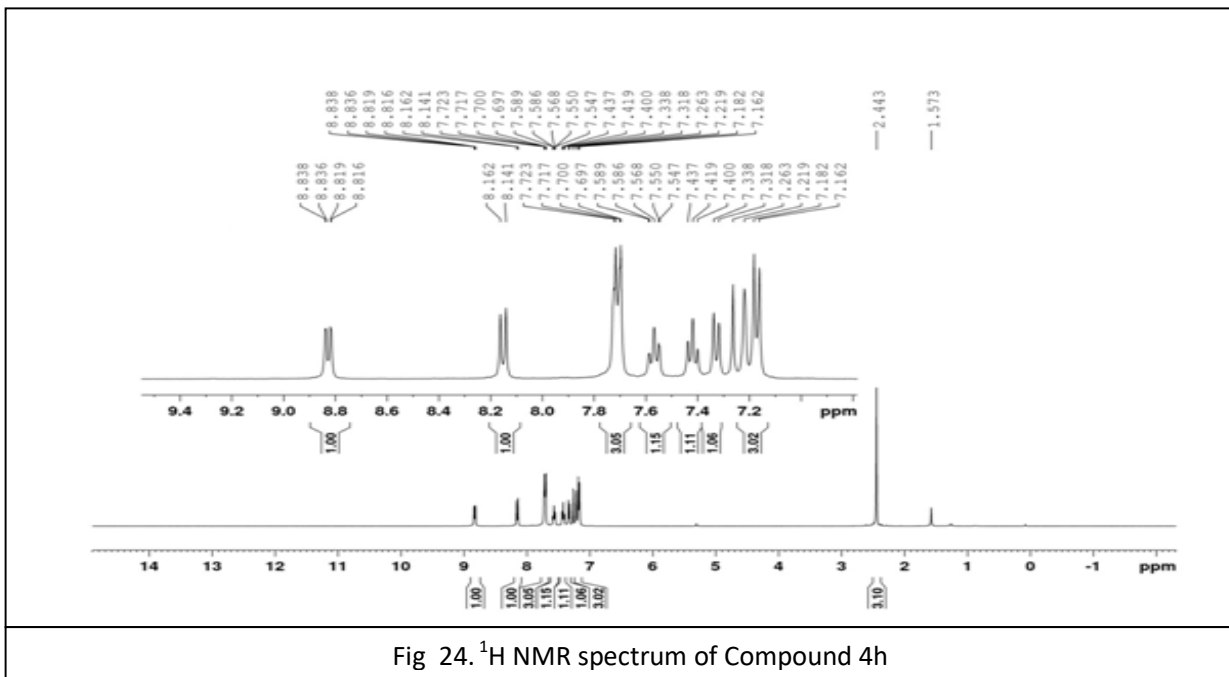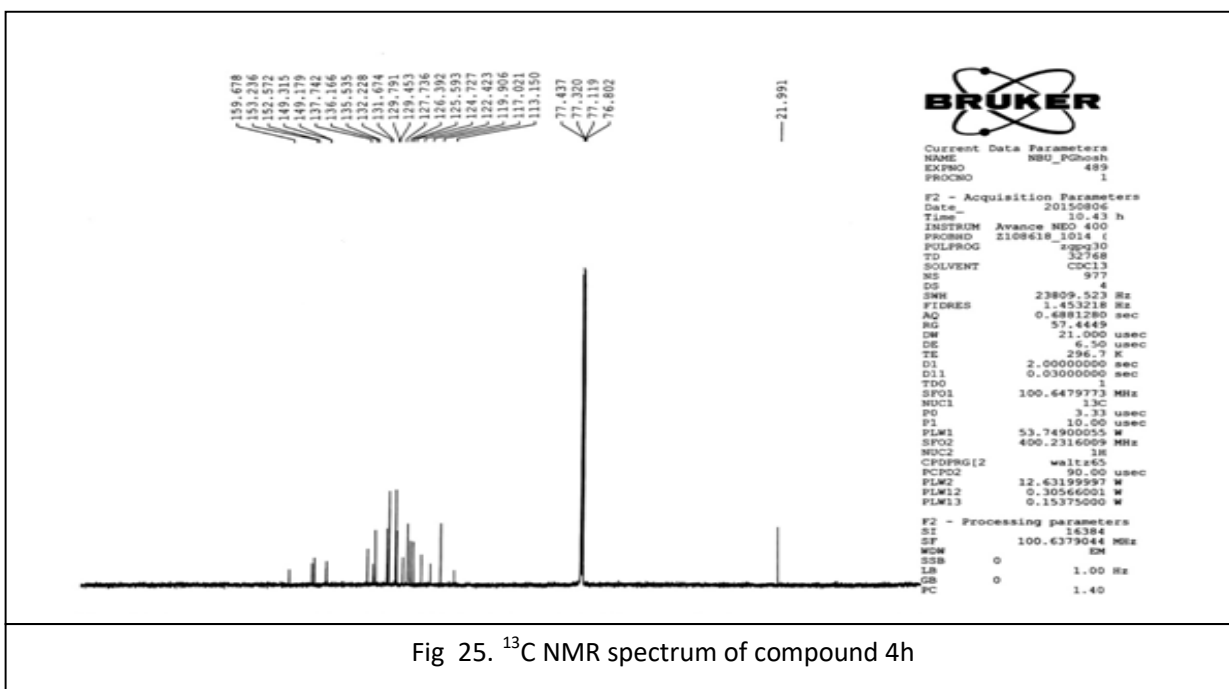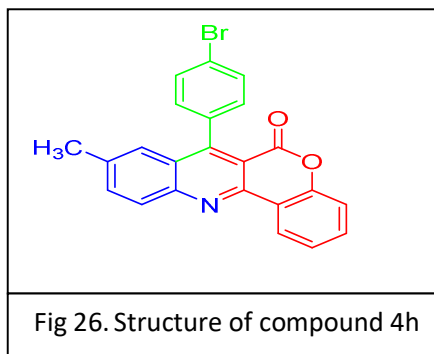





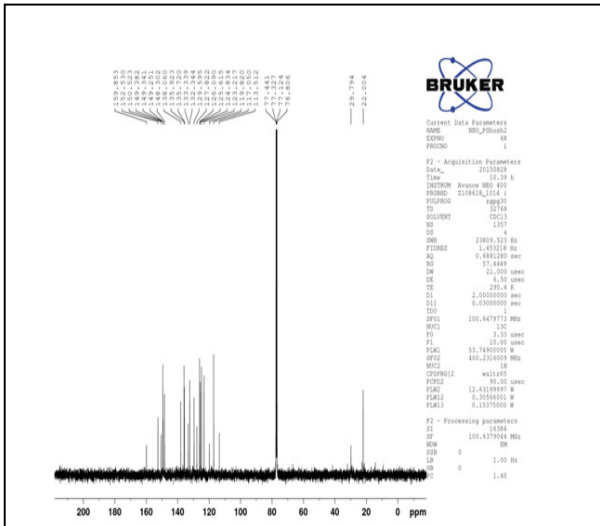

Fig 30. <sup>13</sup>C NMR spectrum of compound 4k

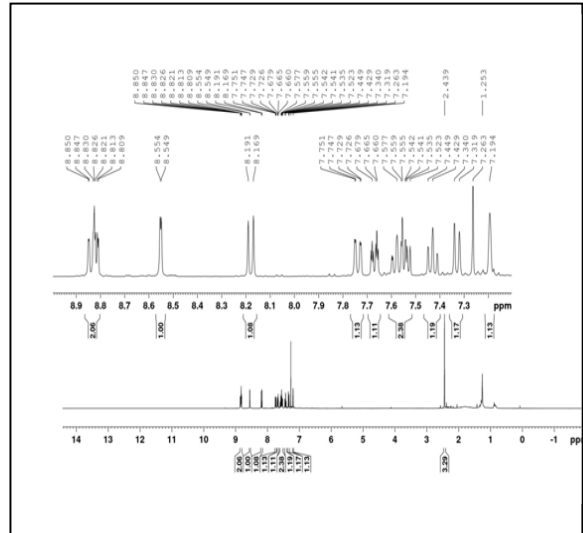

Fig 31. <sup>1</sup>H NMR spectrum of Compound 4k

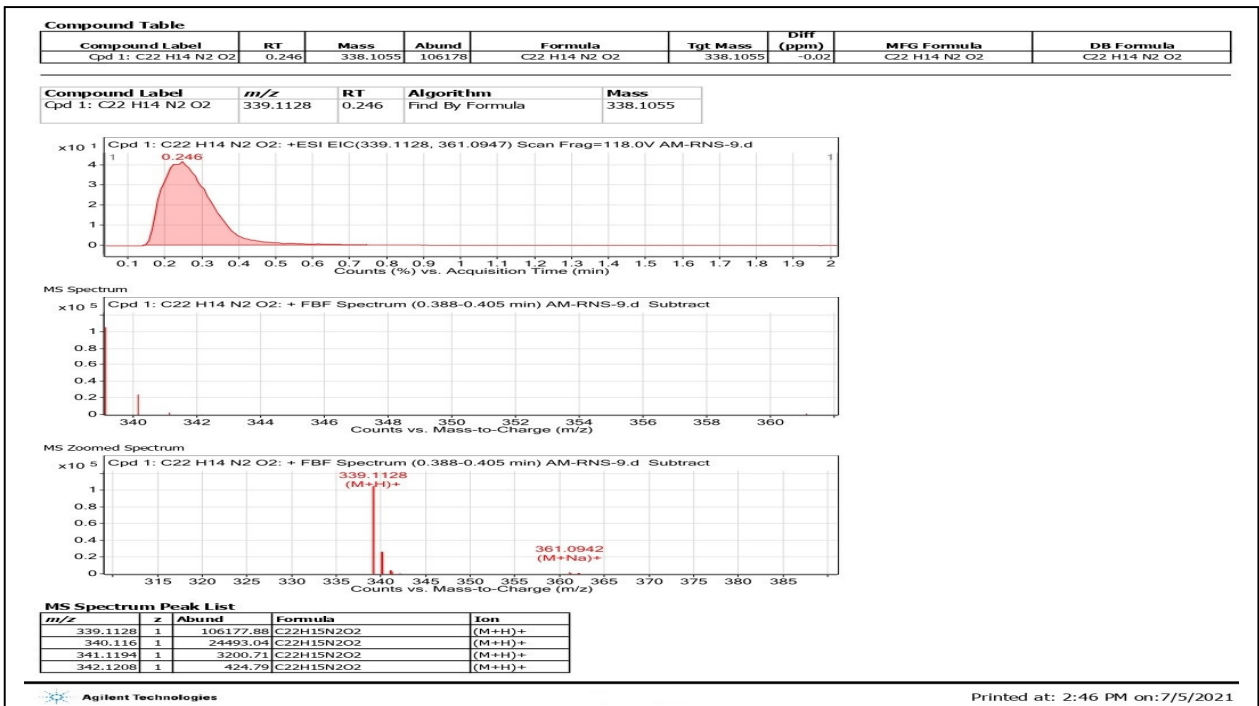

Fig 32. Mass spectrum of Compound 4k

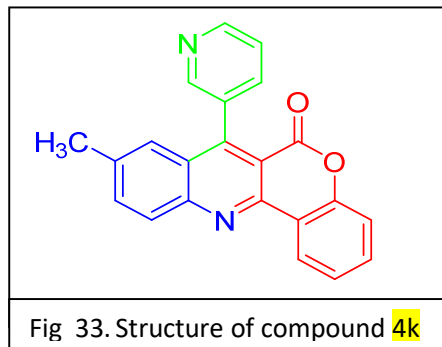

Fig 33. Structure of compound 4k

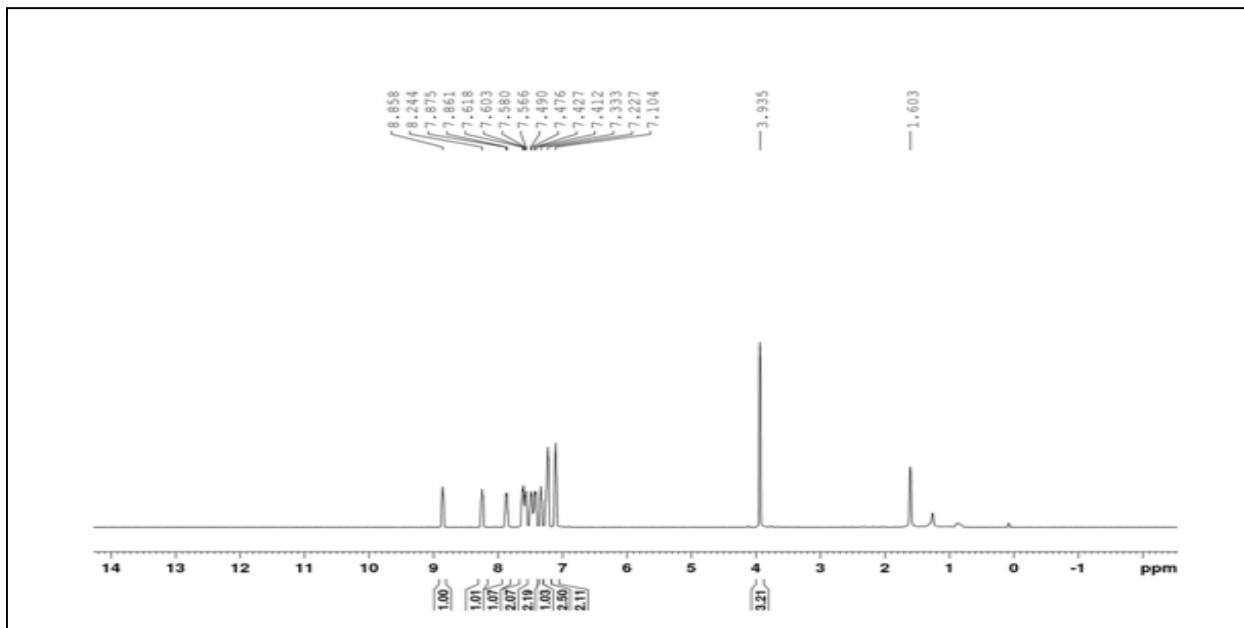

Fig 34. <sup>1</sup>H NMR spectrum of Compound 4I

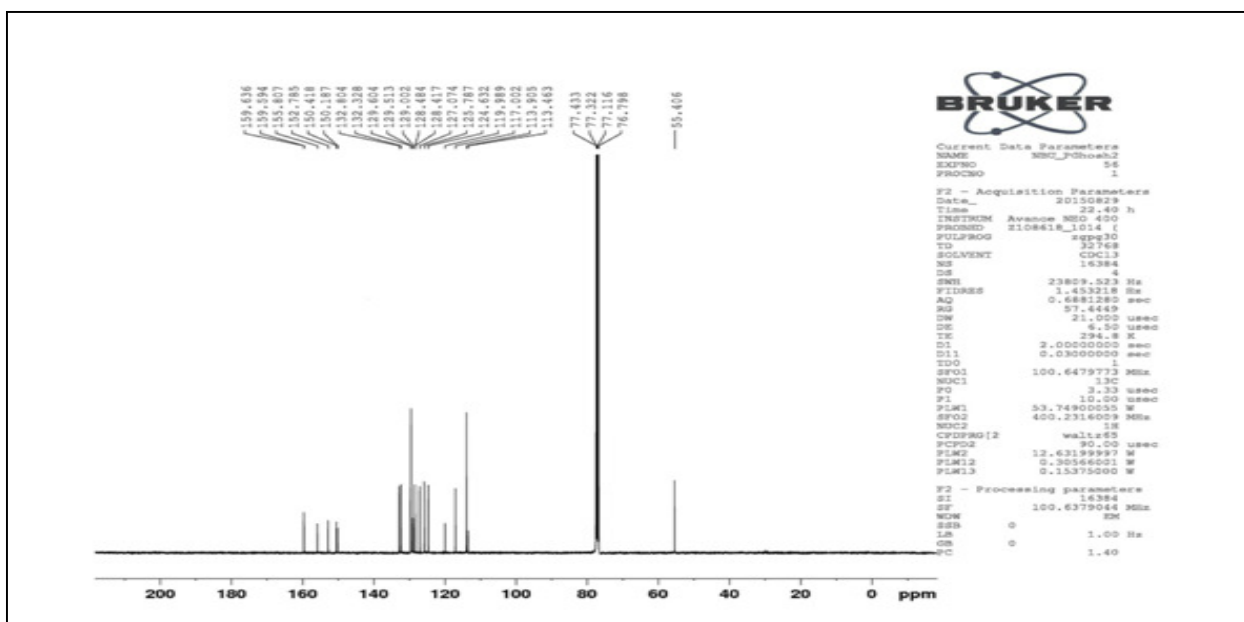

Fig 35. <sup>13</sup>C NMR spectrum of compound 4I

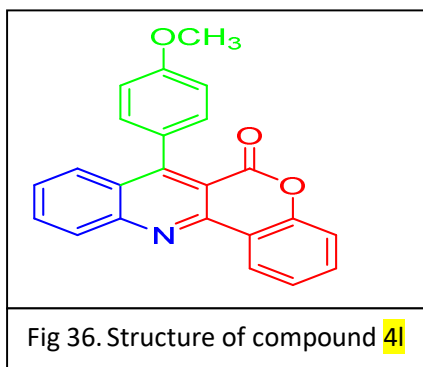

Fig 36. Structure of compound 4I

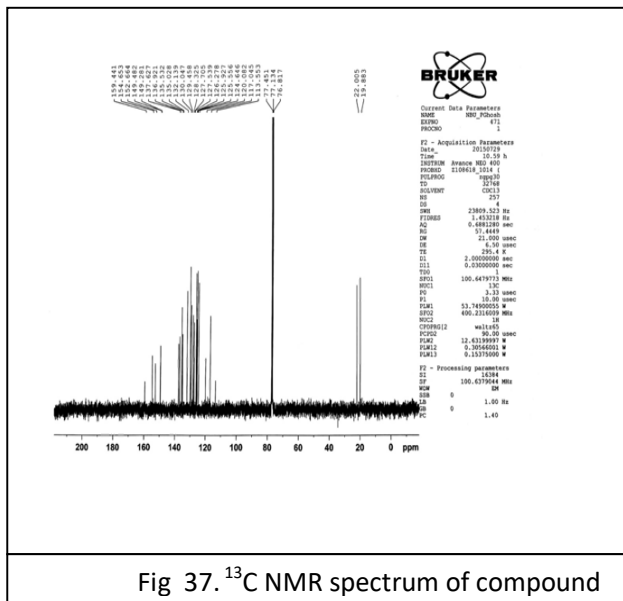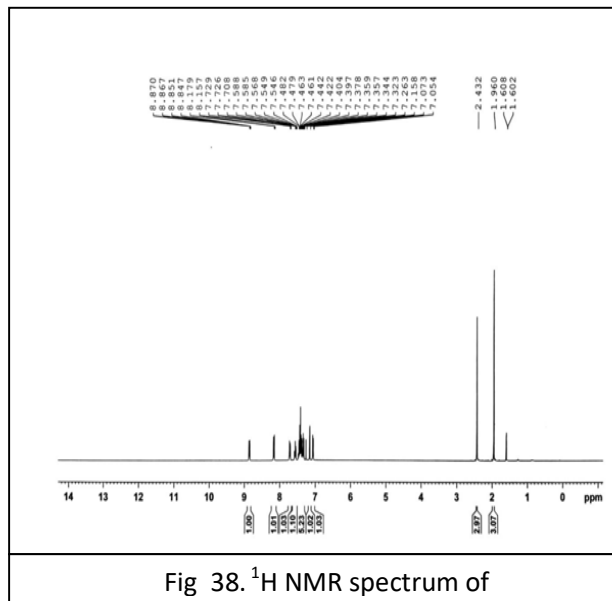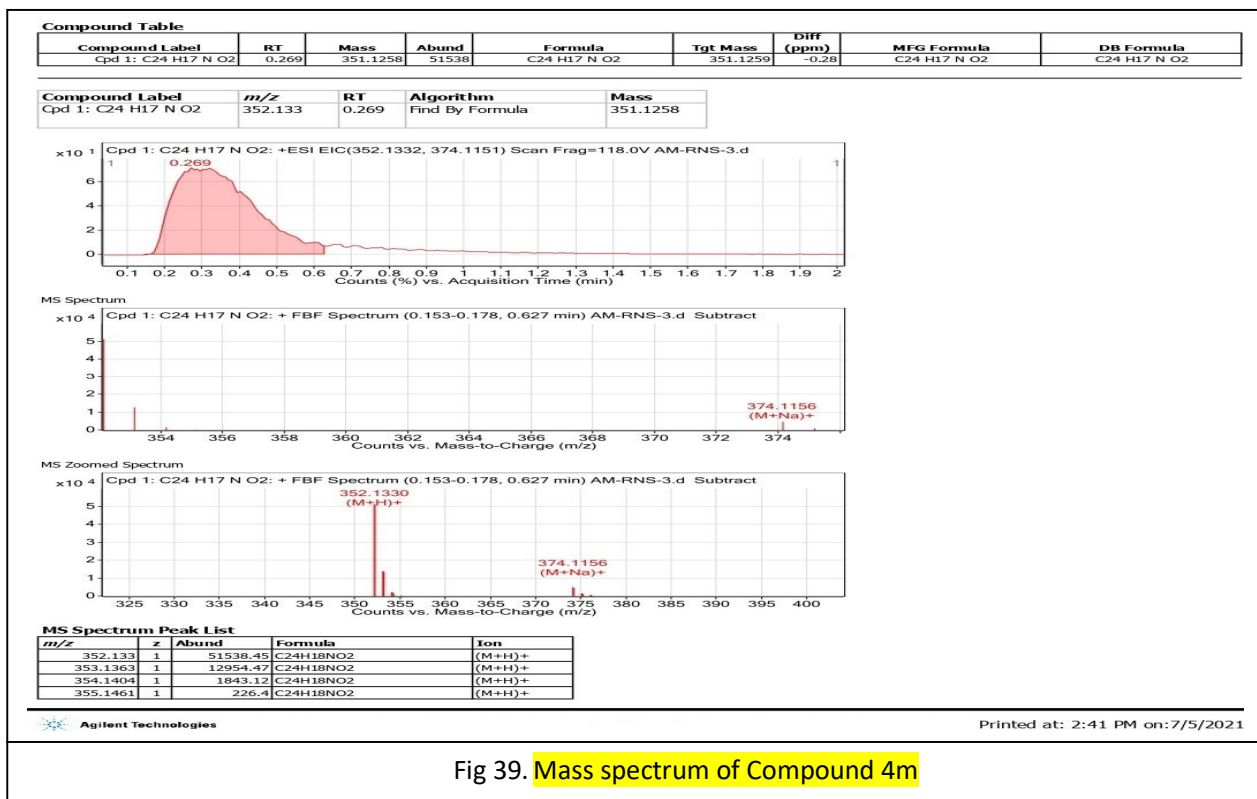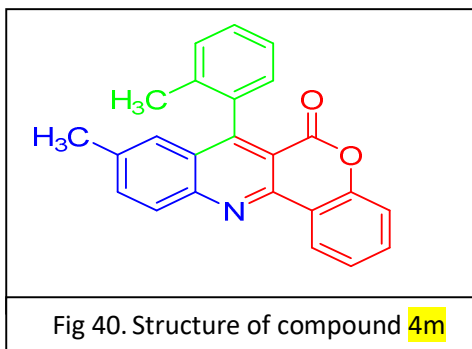

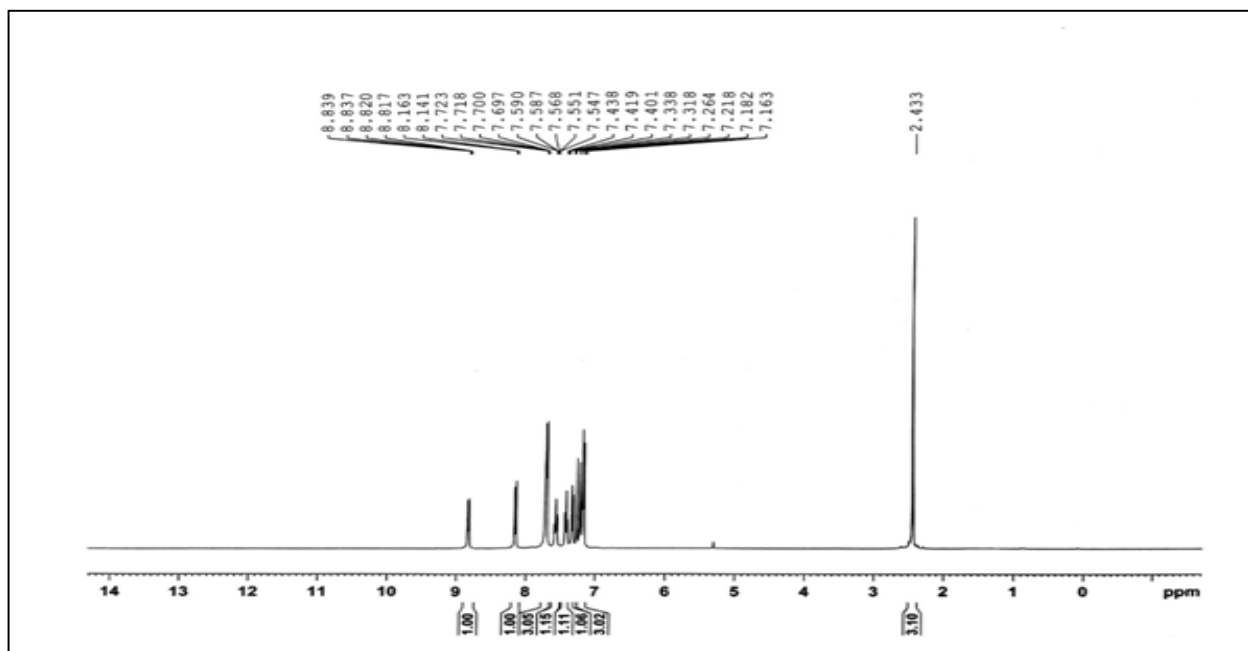

Fig 41. <sup>1</sup>H NMR spectrum of Compound 4n

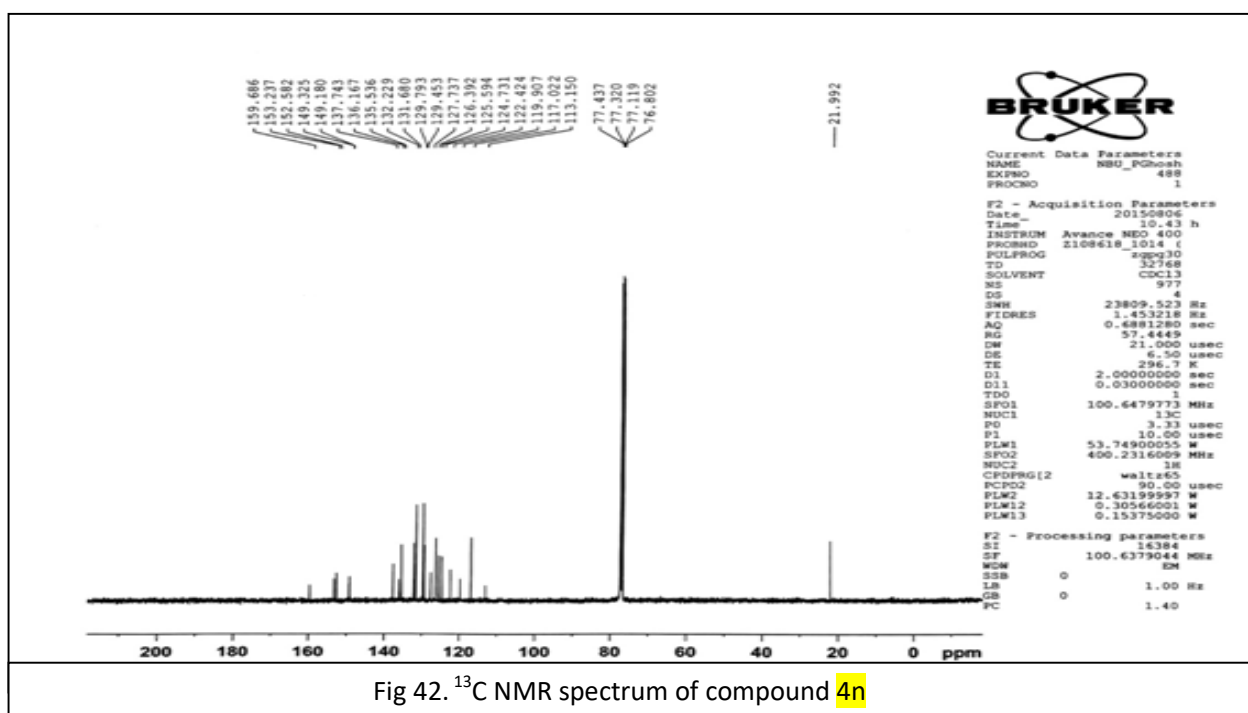

Fig 42. <sup>13</sup>C NMR spectrum of compound 4n

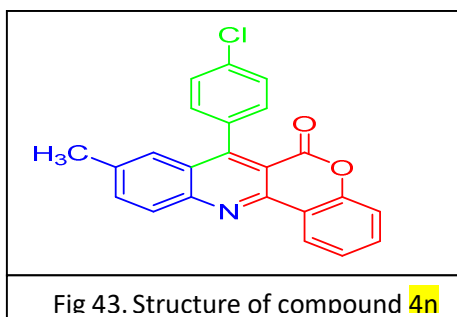

Fig 43. Structure of compound 4n

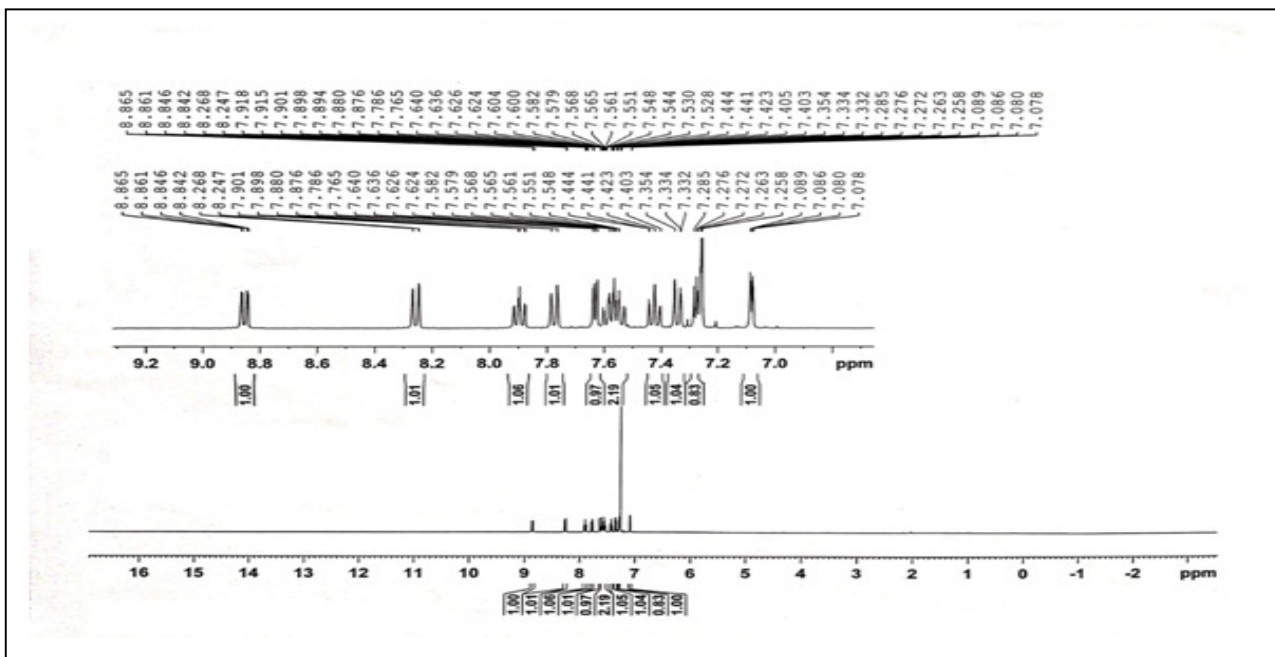

Fig 44. <sup>1</sup>H NMR spectrum of Compound 4o

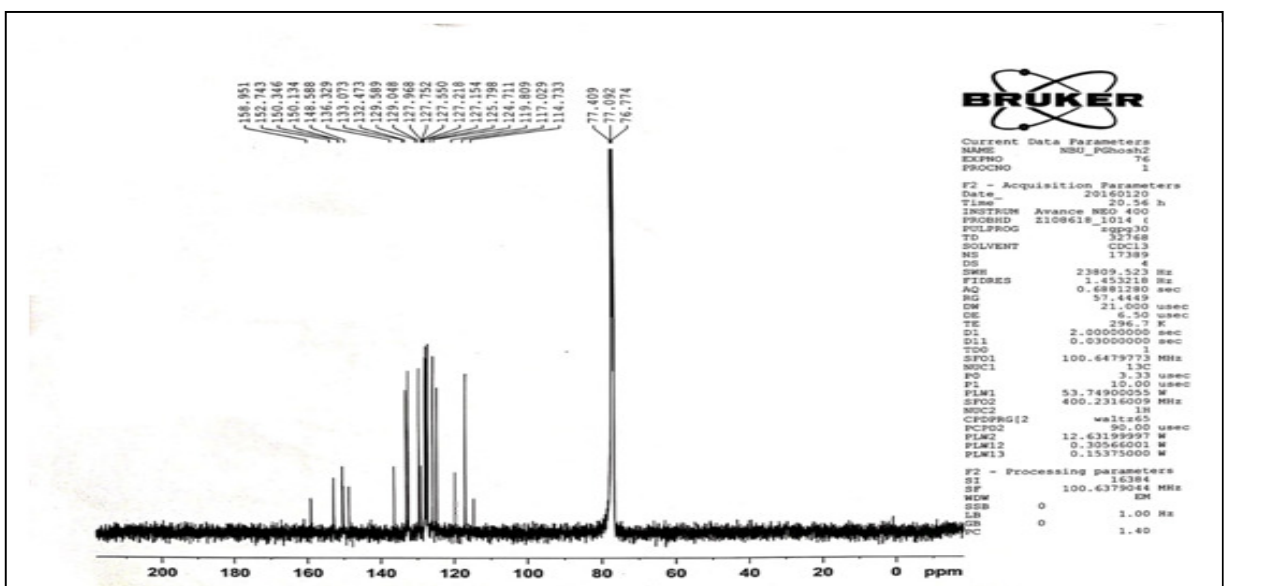

Fig 45. <sup>13</sup>C NMR spectrum of compound 4o

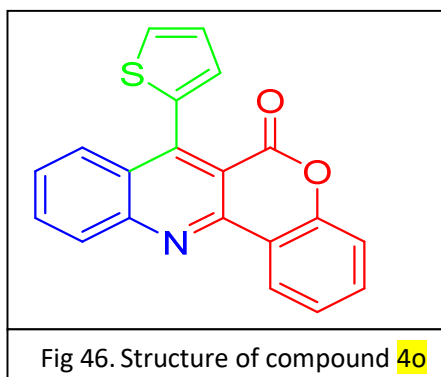

Fig 46. Structure of compound 4o
